# Supplementary material for: Barriers to automated external defibrillator use among urban residents in Khon Kaen, Thailand: A cross-sectional survey
Source: Research Square preprint supplement (doi:10.21203/rs.3.rs-7580807/v1), 2025-10-22
Supplement: Supplementary file 1 [file 3a5f46eb4bed377f9cdd44f4.docx]

# **Supplementary File 3. Additional illustrative quotes on barriers to AED use**

| **Themes** | **Category** | **Code** | **Quotes** |
| --- | --- | --- | --- |
| Motivation to help | Desire for the patient's survival | Humanitarian values and compassion (feeling sorry for the patients) | “I feel sorry for fellow human beings” #107  “Our sense of humanity doesn't allow us to stand by and let a fellow human die right in front of us 😊😊” #65  “It's about helping fellow human beings” #91 |
|  |  | Altruism (want to save lives/desire to help) | “Always willing to help” #183  “Want to help” # 10, 11, 14, 15, 16, 27, 39, 49, 50, 59, 67, 88, 90, 94, 95, 102, 106, 117, 120, 126, 128, 129, 130, 132, 207, 218, 335, 371, 373, 378  “Get to help” # 5, 10, 18, 24, 30, 33, 40, 49, 50, 56, 59, 61, 73, 77, 82, 90, 91, 92, 98, 121, 122, 124, 125, 127, 128, 129, 130, 133, 139, 145, 146, 148, 150, 151, 156, 164, 175, 194, 196, 199, 206, 219, 216, 269, 365, 384, 385  “You can be a hero too!!!!” #167 |
|  | A sense of moral obligation | Moral imperative | “Must help” # 38, 43, 69, 80, 113, 118, 270  “Saving lives is the right thing to do” #34  “Saving a life is a basic thing that everyone should do. It is mutual help" #114  “When someone is dying, we must help” #28 |
|  | Cultural norms and Buddhist teachings | To gain merit (Boon) | “Helping others brings merit” #18  “Saving a life is giving life, and it earns merit (gain Boon)” #178 |
| Perception that AEDs are designed only for trained persons or professional use | | Need for AED training | | --- | | Lack of knowledge and confidence | “I do not know the correct way to use it” (#260)  “I am unsure about the steps because I was trained a long time ago” (#136)  “I might not have enough knowledge about lifesaving” (#51)  “I am afraid of doing it wrong, but I would quickly call for help. If there's no other choice, I will do it” (#17) |
|  |  | Previous training provides confidence and a sense of authority in using an AED | “I want to help. Moreover, I have undergone training for it” #207  “I know what to do to help patients. I received the training already” #208 |
|  |  | Belief in the need for certification or formal training | “We must help our fellow humans but within the bounds of basic knowledge” #13  “I think one should undergo training first, as there is considerable amount of electrical current involved. If we do not know how to use it, we might become patients ourselves” #72 |
|  | Reserved for doctors or medical staff | Only doctors or medical staffs should do it | “I am not a doctor.” (#236)  “Medical devices should only be used by doctors.” (#140) |
| Fear to use AED | Fear of further harm to patients | - Fear of causing more harm | “I’m afraid I might do it wrong and cause more harm.” (#128)  “I don’t know how to use it and using it without knowing how could make the patient's condition worse.” (#63) |
|  | Fear of harm to self | - Fear for one’s own safety | “Without proper training, I could become a patient myself” (#72)  “I am concerned about the electricity; I prefer CPR” (#127) |
|  | Fear of litigation | - Fear of legal responsibility for the patient’s outcome | “ I am happy to help because it is about saving lives. Moreover, with guidance from the command center, there should not be any mistakes or risks” #93  “The other party has demonstrated responsibility” # 236 |

AED, automated external defibrillator
